# Supplementary material for: New seed coating containing Trichoderma viride with anti-pathogenic properties
Source: PeerJ journal article supplement (doi:10.7717/peerj.15392), 2023-06-01
Supplement: supplementary_file_2.pdf [file supplementary_file_2.pdf]

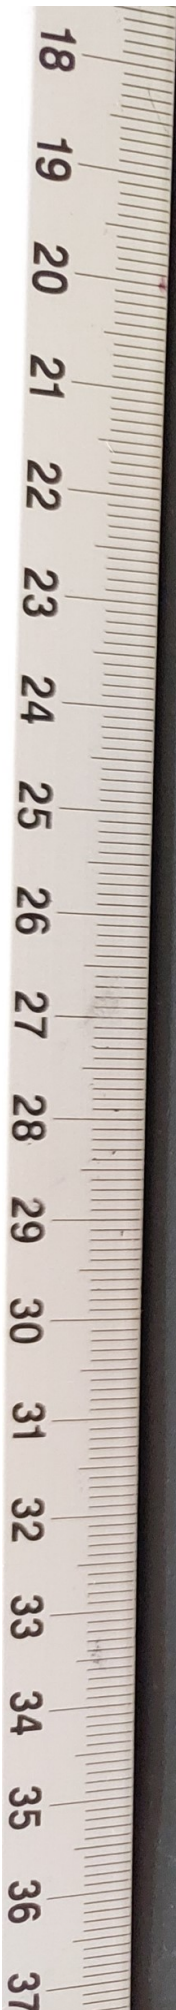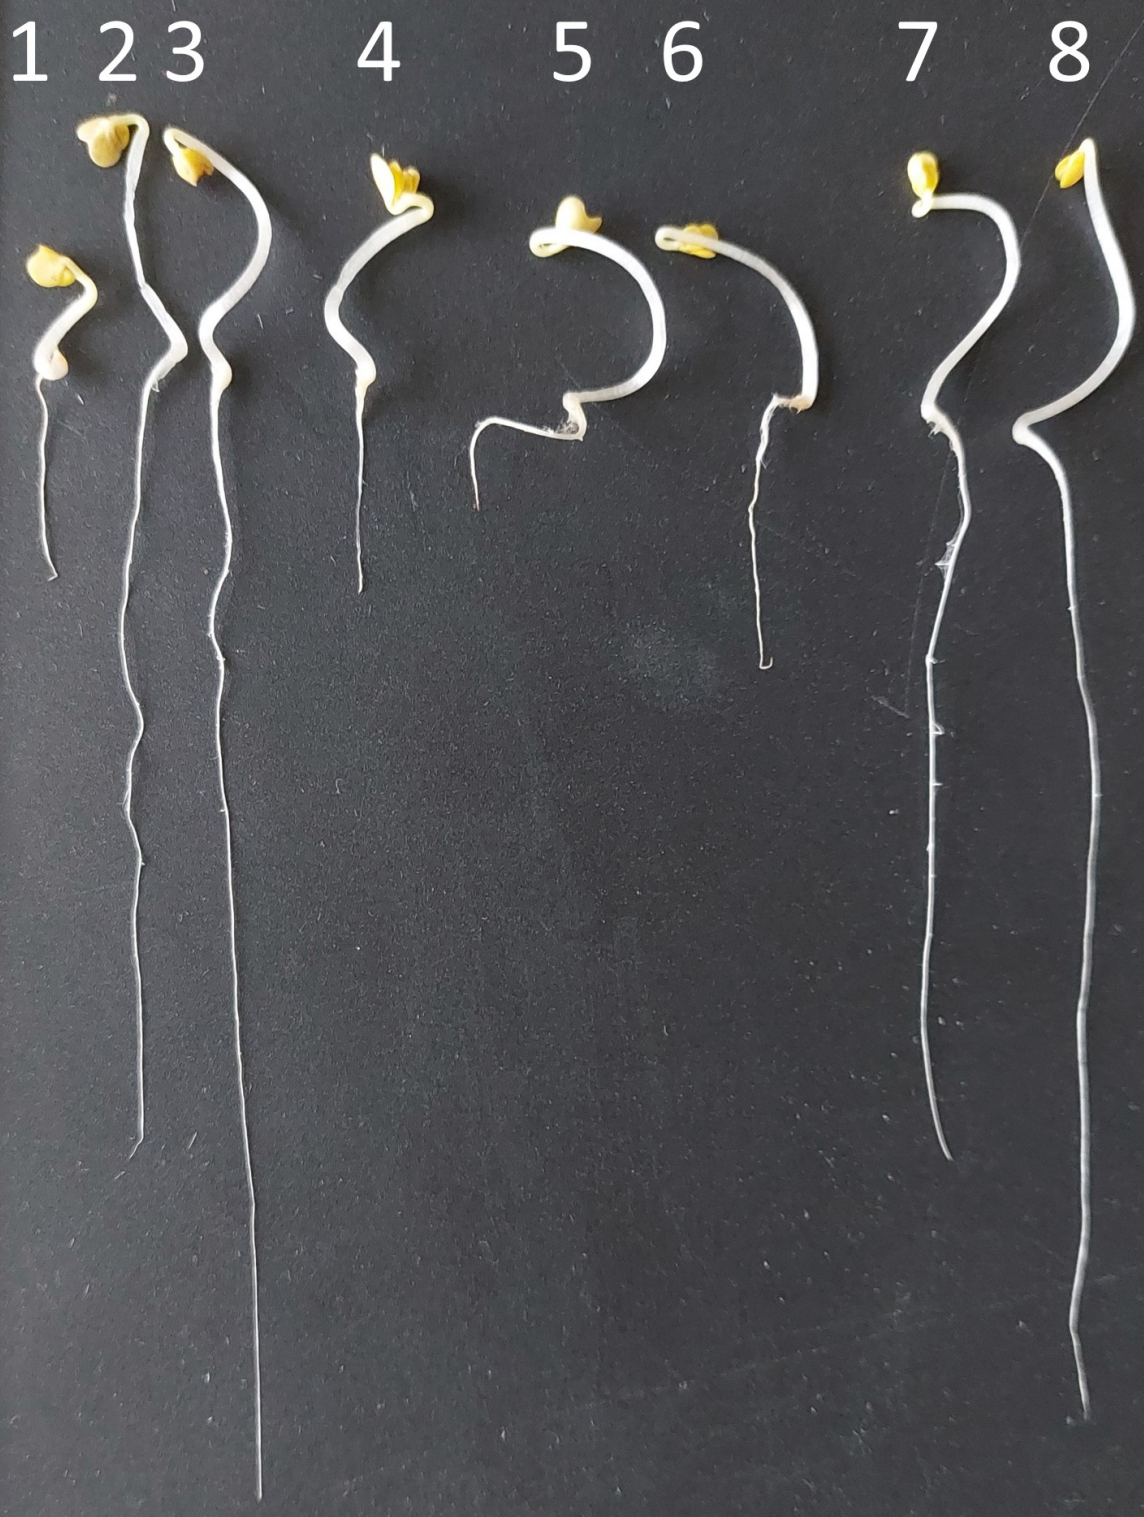

1

2

3

4

5

6

7

8
